# Supplementary material
Source: Springer Nature journal article supplement (https://www.springermedizin.de/resource/supplementary/13014_2010_243_MOESM2_ESM.pdf/9633254)

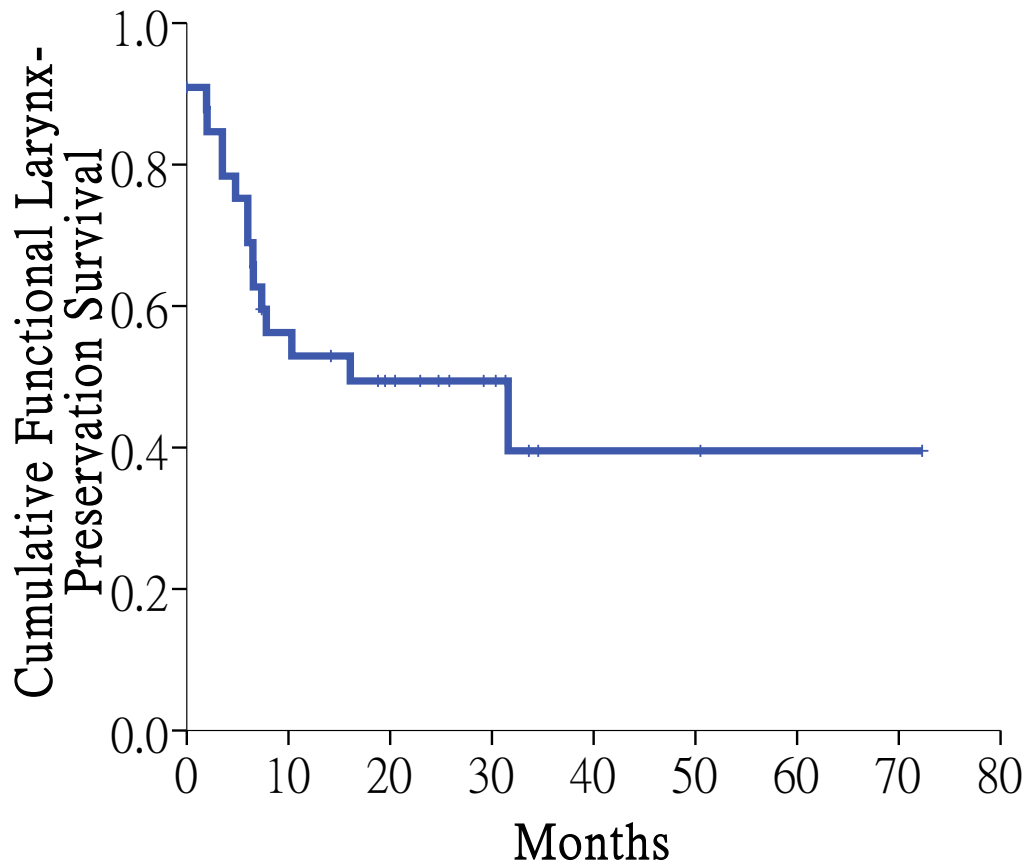

Numbers at Risk

29      17      12      7      2      2      1      1      0

Supplement: MOESM2 [file 9633254]
